# Supplementary material for: Drosophila Model of Human Inherited Triosephosphate Isomerase Deficiency Glycolytic Enzymopathy
Source: Oxford University Press journal article supplement (doi:10.1534/genetics.106.063206), 2006-09-16
Supplement: celotto_et_al._2006_supplemental_legends_and_references.doc [file celotto_et_al._2006_supplemental_legends_and_references.doc]

**SUPPLEMENTAL FIGURE LEGENDS**

**Supplemental Figure 1:** **Conservation of the TPI amino acid sequence.** ClustalW alignment (Megalign, DNAstar) reveals the highly conserved nature of the TPI protein between invertebrates and vertebrates including humans. Red boxes indicate identity to consensus, orange boxes indicates a conservative substitution. Known human mutations are indicated with a bullet above the affected amino acid, as follows: black are substitutions, orange are temperature-sensitive substitutions, and purple result in truncated proteins. The *Drosophila* *sgk1* mutation is indicated with a blue bullet. Yellow bars indicate described dimer interaction sites (Schneider 2000). Species abbreviations are:A.g. *Anopheles gambiae*, XP_321467); D.m. (*Drosophila melanogaster*, NP_788765, TpiF variant); M.m. (*Mus musculus*, AAH46761); R.n. (*Rattus norvegicus*, AAR23524); G.g. (*Gallus gallus*, NP_990782), X.l. (*Xenopus laevis*, AAH46864); and H.s. (*Homo sapiens*, AAH07086). Human mutation data obtained from the following: initiation codon (TPI Paris) (Valent*in et a*l. 2000), frameshift in codon 29 (TPI Alfortville) (Valent*in et a*l. 2000), Cys41Tyr (Ar*ya et a*l. 1997), Gly72Ala (Watana*be et a*l. 1996), Glu104Asp (Da*ar et a*l. 1986), Glu145Termination (Holl*an et a*l. 1997), Val154Met (Watana*be et a*l. 1996), Ile170Val (Ar*ya et a*l. 1997), Arg190Termination (Daar and Maquat 1988), Val231Met (Schneider 2000), Phe240Lys (Cha*ng et a*l. 1993).

**Supplemental Figure 2:** **Overview of glycolysis.** The known biochemical pathway is thought to yield two each ATP, NADH and pyruvate per molecule of glucose. Loss of TPI function is predicted to yield one each NADH, pyruvate and dihydroxyacetone phosphate (DHAP) per molecule of glucose. Figure adapted from (Garrett 1995).

#

## SUPPLEMENTAL REFERENCES

Arya, R., M. R. Lalloz, A. J. Bellingham and D. M. Layton, 1997 Evidence for founder effect of the Glu104Asp substitution and identification of new mutations in triosephosphate isomerase deficiency. Hum Mutat 10: 290-294.

Chang, M. L., P. J. Artymiuk, X. Wu, S. Hollan, A. Lammi *et al.*, 1993 Human triosephosphate isomerase deficiency resulting from mutation of Phe-240. Am J Hum Genet 52: 1260-1269.

Daar, I. O., P. J. Artymiuk, D. C. Phillips and L. E. Maquat, 1986 Human triose-phosphate isomerase deficiency: a single amino acid substitution results in a thermolabile enzyme. Proc Natl Acad Sci U S A 83: 7903-7907.

Daar, I. O., and L. E. Maquat, 1988 Premature translation termination mediates triosephosphate isomerase mRNA degradation. Mol Cell Biol 8: 802-813.

Garrett, R., Grisham, CM, 1995 *Biochemistry*. Saunders College Publishing, New York.

Hollan, S., M. Magocsi, E. Fodor, M. Horanyi, V. Harsanyi *et al.*, 1997 Search for the pathogenesis of the differing phenotype in two compound heterozygote Hungarian brothers with the same genotypic triosephosphate isomerase deficiency. Proc Natl Acad Sci U S A 94: 10362-10366.

Schneider, A. S., 2000 Triosephosphate isomerase deficiency: historical perspectives and molecular aspects. Baillieres Best Pract Res Clin Haematol 13: 119-140.

Valentin, C., S. Pissard, J. Martin, D. Heron, P. Labrune *et al.*, 2000 Triose phosphate isomerase deficiency in 3 French families: two novel null alleles, a frameshift mutation (TPI Alfortville) and an alteration in the initiation codon (TPI Paris). Blood 96: 1130-1135.

Watanabe, M., B. C. Zingg and H. W. Mohrenweiser, 1996 Molecular analysis of a series of alleles in humans with reduced activity at the triosephosphate isomerase locus. Am J Hum Genet 58: 308-316.
